# Supplementary material for: Technologies of lithium recycling from waste lithium ion batteries: a review
Source: Royal Society of Chemistry journal article supplement (doi:10.1039/d1ma00216c), 2021-01-01
Supplement: d1ma00216c1.pdf [file d1ma00216c1.pdf]

## Supplementary information

### Technologies of lithium recycling from waste lithium ion batteries: A Review

Hyuntae Bae,<sup>a</sup> and Youngsik Kim<sup>a,b\*</sup>

a. School of Energy and Chemical Engineering, Ulsan National Institute of Science and Technology (UNIST), Unist-gil 50, Ulsan, 44919, Republic of Korea.

b. Energy Materials and Devices Lab, 4TOONE Corporation, UNIST-gil 50, Ulsan, 44919, Republic of Korea

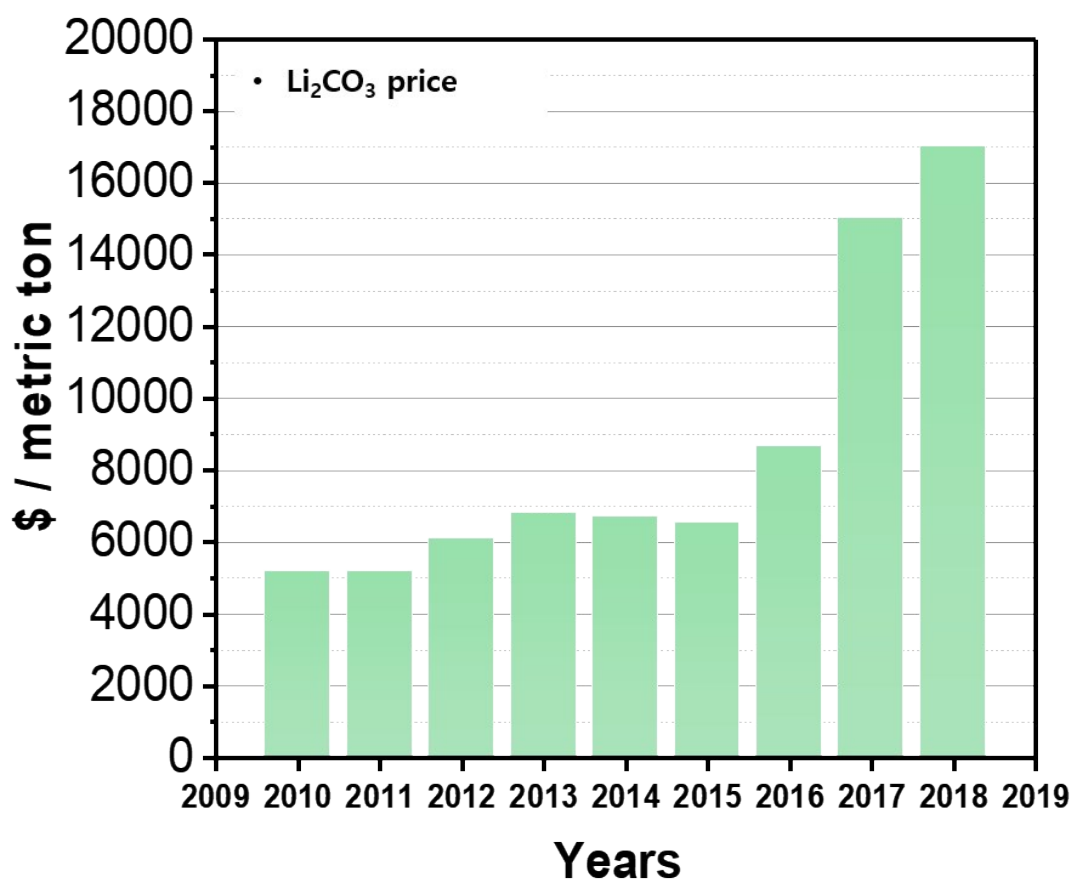

Figure S1 Lithium carbonate price from 2010 to 2018
